# Supplementary material for: Template-free synthesis of graphene-like carbons as efficient carbocatalysts for selective oxidation of alkanes
Source: Royal Society of Chemistry journal article supplement (doi:10.1039/c9gc03781k), 2020-01-01
Supplement: c9gc03781k1.pdf [file c9gc03781k1.pdf]

## Supporting Information

### Template-free Synthesis of Graphene-like Carbons as Efficient Carbocatalysts for Selective Oxidation of Alkanes

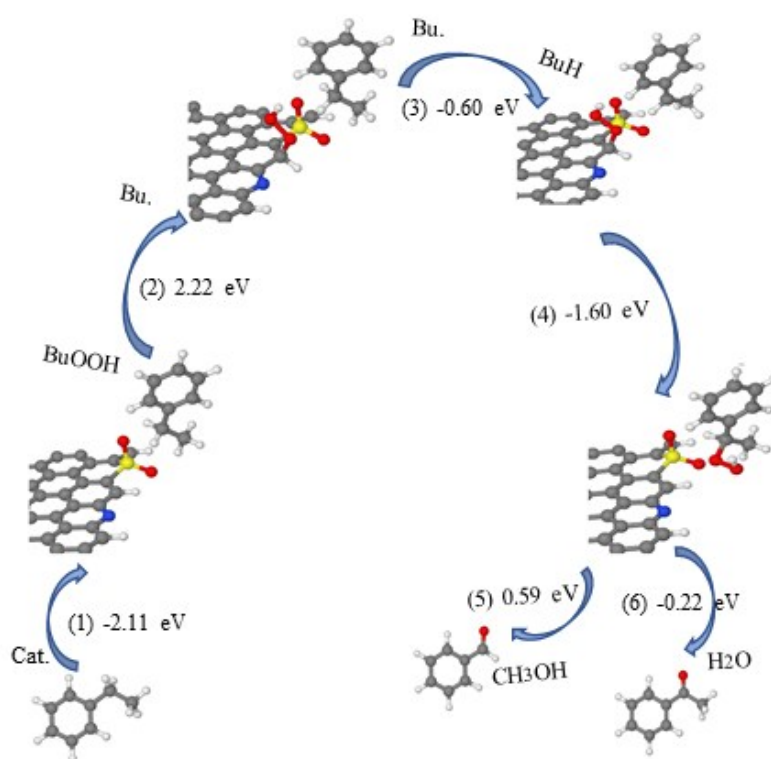

**Figure S1.** The elementary steps of OOH radical mechanism for the ethylbenzene oxidation on pyridinic N and S codoped carbon nanosheet catalyst.

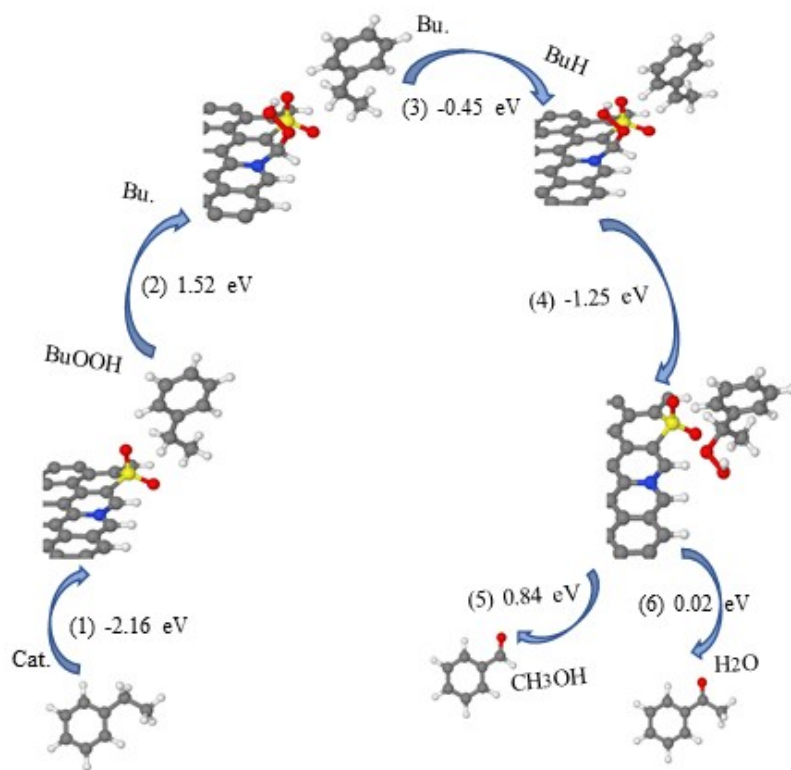

**Figure S2.** The elementary steps of OOH radical mechanism for the ethylbenzene oxidation on graphitic N and S codoped carbon nanosheet catalyst.
